# Supplementary material
Source: ML conference proceedings conference paper supplement (https://proceedings.neurips.cc/paper_files/paper/2020/hash/2000f6325dfc4fc3201fc45ed01c7a5d-Abstract.html)
Supplement: Supplementary file [file 2000f6325dfc4fc3201fc45ed01c7a5d-Supplemental.pdf]

---

# Supplementary Materials of “A Universal Approximation Theorem of Deep Neural Networks for Expressing Probability Distributions”

---

**Yulong Lu**  
 Department of Mathematics and Statistics  
 University of Massachusetts Amherst  
 Amherst, MA 01003  
 lu@math.umass.edu

**Jianfeng Lu**  
 Mathematics Department  
 Duke University  
 Durham, NC 27708  
 jianfeng@math.duke.edu

## A Proof of Proposition 3.1

*Proof.* The proof follows from some previous results by [1] and [4]. In fact, in the one dimensional case, according to [1, Theorem 3.2], we know that if  $\pi$  satisfies that

$$J_1(\pi) = \int_{-\infty}^{\infty} \sqrt{F(x)(1-F(x))} dx < \infty \quad (\text{A.1})$$

where  $F$  is the cumulative distribution function of  $\pi$ , then for every  $n \geq 1$ ,

$$\mathbf{E}\mathcal{W}_1(P_n, \pi) \leq \frac{J_1(\pi)}{\sqrt{n}}. \quad (\text{A.2})$$

The condition (A.1) is fulfilled if  $\pi$  has finite third moment since

$$J_1(\pi) \leq \int_0^{\infty} \sqrt{\mathbf{P}(|X| \geq x)} dx \leq 1 + \int_1^{\infty} \frac{\sqrt{\mathbf{E}|X|^3}}{x^{\frac{3}{2}}} dx = 1 + 2\sqrt{M_3}.$$

In the case that  $d \geq 2$ , it follows from that [4, Theorem 3.1] if  $M_3 = \mathbb{E}_{X \sim \pi} |X|^3 d\pi < \infty$ , then there exists a constant  $c > 0$  independent of  $d$  such that

$$\mathbf{E}\mathcal{W}_1(P_n, \pi) \leq cM_3^{1/3} \cdot \begin{cases} \frac{\log n}{\sqrt{n}} & \text{if } d = 2, \\ \frac{1}{n^{1/d}} & \text{if } d \geq 3. \end{cases} \quad (\text{A.3})$$

□

## B Proof of Proposition 3.2

*Proof.* Thanks to [7, Proposition 3.1], one has that

$$\text{MMD}(P_n, \pi) = \left\| \int_{\mathbb{R}^d} k(\cdot, x) d(P_n - \pi)(x) \right\|_{\mathcal{H}_k}.$$

Let us define  $\varphi(X_1, X_2, \dots, X_n) := \left\| \int_{\mathbb{R}^d} k(\cdot, x) d(P_n - \pi)(x) \right\|_{\mathcal{H}_k}$ . Then by definition  $\varphi(X_1, X_2, \dots, X_n)$  satisfies that for any  $i \in \{1, \dots, n\}$ ,

$$\begin{aligned} & \left| \varphi(X_1, \dots, X_{i-1}, X_i, \dots, X_n) - \varphi(X_1, \dots, X_{i-1}, X'_i, \dots, X_n) \right| \\ & \leq \frac{2}{N} \sup_x \|k(\cdot, x)\|_{\mathcal{H}_k} \\ & \leq \frac{2\sqrt{K_0}}{N}, \forall X_i, X'_i \in \mathbb{R}^d, \end{aligned}$$

where we have used that  $\|k(\cdot, x)\|_{\mathcal{H}_k} = \sup_x \sqrt{k(x, x)} \leq \sqrt{K_0}$  by assumption. It follows from above and the McDiarmid's inequality that for every  $\tau > 0$ , with probability  $1 - e^{-\tau}$ ,

$$\left\| \int_{\mathbb{R}^d} k(\cdot, x) d(P_n - \pi)(x) \right\|_{\mathcal{H}_k} \leq \mathbf{E} \left\| \int_{\mathbb{R}^d} k(\cdot, x) d(P_n - \pi)(x) \right\|_{\mathcal{H}_k} + \sqrt{\frac{2\sqrt{K_0}\tau}{n}}.$$

In addition, we have by the standard symmetrization argument that

$$\mathbf{E} \left\| \int_{\mathbb{R}^d} k(\cdot, x) d(P_n - \pi)(x) \right\|_{\mathcal{H}_k} \leq 2\mathbf{E}\mathbf{E}_\varepsilon \left\| \frac{1}{n} \sum_{i=1}^n \varepsilon_i k(\cdot, X_i) \right\|_{\mathcal{H}_k},$$

where  $\{\varepsilon_i\}_{i=1}^n$  are i.i.d. Radmacher variables and  $\mathbf{E}_\varepsilon$  represents the conditional expectation w.r.t  $\{\varepsilon_i\}_{i=1}^n$  given  $\{X_i\}_{i=1}^n$ . To bound the right hand side above, we can apply McDiarmid's inequality again to obtain that with probability at least  $1 - e^{-\tau}$ ,

$$\begin{aligned} \mathbf{E}\mathbf{E}_\varepsilon \left\| \frac{1}{n} \sum_{i=1}^n \varepsilon_i k(\cdot, X_i) \right\|_{\mathcal{H}_k} &\leq \mathbf{E}_\varepsilon \left\| \frac{1}{n} \sum_{i=1}^n \varepsilon_i k(\cdot, X_i) \right\|_{\mathcal{H}_k} + \sqrt{\frac{2\sqrt{K_0}\tau}{n}} \\ &\leq \left( \mathbf{E}_\varepsilon \left\| \frac{1}{n} \sum_{i=1}^n \varepsilon_i k(\cdot, X_i) \right\|_{\mathcal{H}_k}^2 \right)^{1/2} + \sqrt{\frac{2\sqrt{K_0}\tau}{n}} \\ &\leq \sqrt{\frac{\sqrt{K_0}}{n}} + \sqrt{\frac{2\sqrt{K_0}\tau}{n}}, \end{aligned}$$

where we have used Jensen's inequality for expectation in the second inequality and the independence of  $\varepsilon_i$  and the definition of  $K_0$  in the last inequality. Combining the estimates above yields that with probability at least  $1 - 2e^{-\tau}$ ,

$$\text{MMD}(P_n, \pi) = \left\| \int_{\mathbb{R}^d} k(\cdot, x) d(P_n - \pi)(x) \right\|_{\mathcal{H}_k} \leq 2\sqrt{\frac{\sqrt{K_0}}{n}} + 3\sqrt{\frac{2\sqrt{K_0}\tau}{n}}.$$

□

## C Proof of Proposition 3.3

Thanks to [6, Theorem 3.6],  $\text{KSD}(P_n, \pi)$  is evaluated explicitly as

$$\text{KSD}(P_n, \pi) = \sqrt{\mathbf{E}_{x, y \sim P_n} [u_\pi(x, y)]} = \sqrt{\frac{1}{n^2} \sum_{i, j=1}^n u_\pi(X_i, X_j)}, \quad (\text{C.1})$$

where  $u_\pi$  is a new kernel defined by

$$\begin{aligned} u_\pi(x, y) &= s_\pi(x)^T k(x, y) s_\pi(y) + s_\pi(x)^T \nabla_y k(x, y) \\ &\quad + s_\pi(y)^T \nabla_x k(x, y) + \text{Tr}(\nabla_x \nabla_y k(x, y)) \end{aligned}$$

with  $s_\pi(x) = \nabla \log \pi(x)$ . Moreover, according to [6, Proposition 3.3], if  $k$  satisfies Assumption K1, then  $\text{KSD}(P_n, \pi)$  is non-negative.

Our proof of Proposition 3.3 relies on the fact that  $\text{KSD}^2(P_n, \pi)$  can be viewed as a von Mises' statistics ( $V$ -statistics) and an important Bernstein type inequality due to [2] for the distribution of  $V$ -statistics, which gives a concentration bound of  $\text{KSD}^2(P_n, \pi)$  around its mean (which is zero). We recall this inequality in the theorem below, which is a restatement of [2, Theorem 1] for second order degenerate  $V$ -statistics.

### C.1 Bernstein type inequality for von Mises' statistics

Let  $X_1, \dots, X_n, \dots$  be a sequence of i.i.d. random variables on  $\mathbb{R}^d$ . For a kernel  $h(x, y) : \mathbb{R}^d \times \mathbb{R}^d \rightarrow \mathbb{R}$ , we call

$$V_n = \sum_{i, j=1}^n h(X_i, X_j) \quad (\text{C.2})$$

a von-Mises' statistic of order 2 with kernel  $h$ . We say that the kernel  $h$  is *degenerate* if the following holds:

$$\mathbf{E}[h(X_1, X_2)|X_1] = \mathbf{E}[h(X_1, X_2)|X_2] = 0. \quad (\text{C.3})$$

**Theorem C.1** ([2, Theorem 1]). *Consider the V-statistic  $M_n$  defined by (C.2) with a degenerate kernel  $h$ . Assume the kernel satisfies that*

$$|h(x, y)| \leq g(x) \cdot g(y) \quad (\text{C.4})$$

for all  $x, y \in \mathbb{R}^d$  with a function  $g : \mathbb{R}^d \rightarrow \mathbb{R}$  satisfying for  $\xi, J > 0$ ,

$$\mathbf{E}[g(X_1)^k] \leq \xi^2 J^{k-2} k! / 2, \quad (\text{C.5})$$

for all  $k = 2, 3, \dots$ . Then there exist some generic constants  $C_1, C_2 > 0$  independent of  $k, h, l, \xi$  such that for any  $t \geq 0$  that

$$\mathbf{P}(|V_n| \geq n^2 t) \leq C_1 \exp\left(-\frac{C_2 n t}{\xi^2 + J t^{1/2}}\right). \quad (\text{C.6})$$

**Remark C.1.** *As noted in [2, Remark 1], the inequality (C.6) is to some extent optimal. Moreover, a straightforward calculation shows that inequality (C.6) implies that for any  $\delta \in (0, 1)$ ,*

$$\mathbf{P}\left(\frac{1}{n^2} |V_n| \leq \frac{\mathcal{V}}{n}\right) \geq 1 - \delta, \quad (\text{C.7})$$

where

$$\mathcal{V} = \left(\frac{J \log(\frac{C_1}{\delta})}{C_2} + \sqrt{\frac{\log(\frac{C_1}{\delta})}{C_2} \xi}\right)^2.$$

## C.2 Moment bound of sub-Gaussian random vectors

Let us first recall a useful concentration result on sub-Gaussian random vectors.

**Theorem C.2** ([3, Theorem 2.1]). *Let  $X \in \mathbb{R}^d$  be a sub-Gaussian random vector with parameters  $m \in \mathbb{R}^d$  and  $v > 0$ . Then for any  $t > 0$ ,*

$$\mathbf{P}\left(|X - m| \geq v \sqrt{d + 2\sqrt{dt} + 2t}\right) \leq e^{-t}. \quad (\text{C.8})$$

Moreover, for any  $0 \leq \eta < \frac{1}{2v^2}$ ,

$$\mathbf{E} \exp(\eta |X - m|^2) \leq \exp(v^2 d \eta + \frac{v^4 d \eta^2}{1 - 2v^2 \eta}). \quad (\text{C.9})$$

As a direct consequence of Theorem C.2, we have the following useful moment bound for sub-Gaussian random vectors.

**Proposition C.1.** *Let  $X \in \mathbb{R}^d$  be a sub-Gaussian random vector with parameters  $m \in \mathbb{R}^d$  and  $v > 0$ . Then for any  $k \geq 2$ ,*

$$\mathbf{E}|X - m|^k \leq k((2v\sqrt{d})^k + \frac{1}{2}(\frac{4v}{\sqrt{2}})^k k^{k/2}). \quad (\text{C.10})$$

*Proof.* From the concentration bound (C.8) and the simple fact that

$$d + 2\sqrt{dt} + 2t = 2\left(\sqrt{t} + \frac{\sqrt{d}}{2}\right)^2 + \frac{d}{2} \leq 4\left(\sqrt{t} + \frac{\sqrt{d}}{2}\right)^2,$$

one can obtain that

$$\mathbf{P}\left(|X - m| \geq 2v\left(\sqrt{t} + \frac{\sqrt{d}}{2}\right)\right) \leq \mathbf{P}\left(|X - m| \geq v\sqrt{d + 2\sqrt{dt} + 2t}\right) \leq e^{-t}.$$

Therefore, for any  $s \geq v\sqrt{d}$ , we obtain from above with  $s = 2v(\sqrt{t} + \sqrt{d}/2)$  that

$$\mathbf{P}\left(|X - m| \geq s\right) \leq e^{-\left(\frac{s}{2v} - \frac{\sqrt{d}}{2}\right)^2}. \quad (\text{C.11})$$

As a result, for any  $k \geq 2$ ,

$$\begin{aligned}
\mathbf{E}|X - m|^k &= \int_0^\infty \mathbf{P}(|X - m|^k \geq s) ds \\
&= \int_0^\infty \mathbf{P}(|X - m|^k \geq s^k) k s^{k-1} ds \\
&= \int_0^{2v\sqrt{d}} \mathbf{P}(|X - m| \geq s) k s^{k-1} ds + \int_{2v\sqrt{d}}^\infty \mathbf{P}(|X - m| \geq s) k s^{k-1} ds \\
&=: I_1 + I_2,
\end{aligned} \tag{C.12}$$

where we have used the change of variable  $s \mapsto s^k$  in the second line above. It is clear that the first term

$$I_1 \leq k(2v\sqrt{d})^k.$$

For  $I_2$ , one first notices that if  $s \geq 2v\sqrt{d}$ , then  $s/(2v) - \sqrt{d}/2 \geq s/(4v)$ . Hence it follows from (C.8) that

$$\begin{aligned}
I_2 &\leq \int_{2v\sqrt{d}}^\infty e^{-\left(\frac{s}{4v}\right)^2} k s^{k-1} ds \\
&= \frac{k(4v)^k}{2} \int_{\frac{d}{4}}^\infty e^{-t} t^{\frac{k-2}{2}} dt \\
&\leq \frac{k(4v)^k}{2} \Gamma\left(\frac{k}{2}\right).
\end{aligned}$$

The last two estimates imply that

$$\begin{aligned}
\mathbf{E}|X - m|^k &\leq k(2v\sqrt{d})^{k-1} + \frac{k(4v)^k}{2} \Gamma\left(\frac{k}{2}\right) \\
&\leq k((2v\sqrt{d})^k + \frac{1}{2} \left(\frac{4v}{\sqrt{2}}\right)^k k^{k/2}),
\end{aligned}$$

where the second inequality above follows from  $\Gamma(\frac{k}{2}) \leq (k/2)^{k/2}$  for  $k \geq 2$ .  $\square$

### C.3 Proof of Proposition 3.3

Our goal is to invoke Theorem C.1 to obtain a concentration inequality for KSD. Recall that  $\text{KSD}(P_n, \pi)$  is defined by

$$\text{KSD}^2(P_n, \pi) = \frac{1}{n^2} \sum_{i,j=1}^n u_\pi(X_i, X_j)$$

with the kernel

$$u_\pi(x, y) = s_\pi(x)^T k(x, y) s_\pi(y) + s_q(x)^T \nabla_y k(x, y) + s_q(y)^T \nabla_x k(x, y) + \text{Tr}(\nabla_x \nabla_y k(x, y)).$$

Let us first verify that the new kernel  $u_\pi$  satisfies the assumption of Theorem C.1. In fact, since  $s_\pi(x) = \nabla \log(\pi(x))$ , one obtains from integration by part that

$$\begin{aligned}
\mathbf{E}[u_\pi(X_1, X_2) | X_1 = x] &= \int_{\mathbb{R}^d} u_\pi(x, y) d\pi(y) \\
&= \int_{\mathbb{R}^d} s_\pi(x) k(x, y) s_\pi(y) + s_q(x)^T \nabla_y k(x, y) \\
&\quad + s_\pi(y)^T \nabla_x k(x, y) + \text{Tr}(\nabla_x \nabla_y k(x, y)) d\pi(y) \\
&= \int_{\mathbb{R}^d} k(x, y) s_\pi(x)^T \nabla_y \pi(y) dy - \int_{\mathbb{R}^d} \nabla_y \cdot (s_\pi(x) \pi(y)) dy \\
&\quad + \int_{\mathbb{R}^d} \nabla_y \pi(y)^T \nabla_x k(x, y) dy - \int_{\mathbb{R}^d} \nabla_y \pi(y)^T \nabla_x k(x, y) dy \\
&= 0.
\end{aligned}$$

Similarly, one has

$$\mathbf{E}[u_\pi(X_1, X_2)|X_2 = y] = 0.$$

This shows that  $u_\pi$  satisfies the condition of degeneracy (C.3).

Next, we show that  $u_\pi$  satisfies the bound (C.4) with a function  $g$  satisfying the moment condition (C.5). In fact, by Assumption K3 on the kernel  $k$  and Assumption 1 on the target density  $\pi$ ,

$$\begin{aligned} |u_\pi(x, y)| &\leq L^2 K_1(1 + |x|) \cdot (1 + |y|) + LK_1(1 + |x| + 1 + |y|) + K_1(1 + d) \\ &\leq K_1(L + 1)^2(\sqrt{d} + 1 + |x|) \cdot (\sqrt{d} + 1 + |y|) \\ &=: g(x) \cdot g(y), \end{aligned}$$

where  $g(x) = \sqrt{K_1}(L + 1)(\sqrt{d} + 1 + |x|)$  and the constant  $L$  is defined in (2.6). To verify  $g$  satisfies (C.5), we write

$$\begin{aligned} \mathbf{E}_{X \sim \pi}[g(X)^k] &= (\sqrt{K_1}(L + 1))^k \mathbf{E}_{X \sim \pi}[(\sqrt{d} + 1 + |X|)^k] \\ &\leq (\sqrt{K_1}(L + 1))^k \mathbf{E}_{X \sim \pi}[(\sqrt{d} + 1 + |m| + |X - m|)^k] \\ &= (\sqrt{K_1}(L + 1))^k \left( (\sqrt{d} + 1 + |m|)^k + \sum_{j=1}^k \binom{k}{j} (\sqrt{d} + 1 + |m|)^{k-j} \mathbf{E}_{X \sim \pi}|X - m|^j \right). \end{aligned} \tag{C.13}$$

Thanks to Proposition C.1, we have for any  $j \geq 1$ ,

$$\begin{aligned} \mathbf{E}_{X \sim \pi}|X - m|^j &\leq (\mathbf{E}_{X \sim \pi}|X - m|^{2j})^{1/2} \\ &\leq (2j)^{1/2} \cdot \left( (2v\sqrt{d})^{2j} + \frac{1}{2} \left( \frac{4v}{\sqrt{2}} \right)^{2j} \cdot (2j)^j \right)^{1/2} \\ &\leq (2j)^{1/2} \cdot \left( 2 \max(4v, 1) \cdot \sqrt{d} \cdot \sqrt{j} \right)^j \\ &\leq \left( 2e^{1/e} \max(4v, 1) \cdot \sqrt{d} \cdot \sqrt{j} \right)^j, \end{aligned} \tag{C.14}$$

where we have used the simple fact that  $(2j)^{1/(2j)} \leq e^{1/e}$  for any  $j \geq 1$  in the last inequality. Plugging (C.14) into (C.13) yields that

$$\begin{aligned} \mathbf{E}_{X \sim \pi}[g(X)^k] &\leq 2(\sqrt{K_1}(L + 1))^k \left( \sqrt{d} + 1 + |m| + 2e^{1/e} \max(4v, 1) \sqrt{d} \cdot \sqrt{k} \right)^k \\ &= 2(\sqrt{K_1}(L + 1))^k \exp \left( k \log \left( \sqrt{d} + 1 + |m| + 2e^{1/e} \max(4v, 1) \sqrt{d} \cdot \sqrt{k} \right) \right). \end{aligned} \tag{C.15}$$

Using the fact that  $\log(a + b) - \log(a) = \log(1 + b/a) \leq b/a$  for all  $a, b \geq 1$ , one has

$$\begin{aligned} &\exp \left( k \log \left( \sqrt{d} + 1 + |m| + 2e^{1/e} \max(4v, 1) \sqrt{d} \cdot \sqrt{k} \right) \right) \\ &\leq \exp \left( k \log \left( \underbrace{2e^{1/e} \max(4v, 1) \sqrt{d} \cdot \sqrt{k}}_{=:A} \right) \right) \cdot \exp \left( \underbrace{\sqrt{k} \cdot \frac{\sqrt{d} + 1 + |m|}{2e^{1/e} \max(4v, 1) \sqrt{d}}}_{=:B} \right). \end{aligned} \tag{C.16}$$

Since by assumption  $|m| \leq m^* \sqrt{d}$  and  $d \geq 1$ , we have

$$B \leq \frac{2 + m^*}{2e^{1/e} \max(4v, 1)} =: \tilde{B}.$$

As a consequence of above and the fact that  $k! \geq \left(\frac{k}{3}\right)^k$  for any  $k \in \mathbb{N}_+$ ,

$$\begin{aligned} &\exp \left( k \log \left( \sqrt{d} + 1 + |m| + 2e^{1/e} \max(4v, 1) \sqrt{d} \cdot \sqrt{k} \right) \right) \\ &\leq \exp(k \log k/2) \cdot \exp(k(\log A + \tilde{B})) \\ &= \left(\frac{k}{3}\right)^{k/2} \cdot \left(\sqrt{3}A \exp(\tilde{B} + \frac{1}{2})\right)^k \\ &\leq k! \cdot \left(\sqrt{3}A \exp(\tilde{B} + \frac{1}{2})\right)^k. \end{aligned} \tag{C.17}$$

Combining this with (C.15) implies that the moment bound assumption (C.5) holds with the constants

$$J = \sqrt{3K_1}(L+1)A \exp\left(\tilde{B} + \frac{1}{2}\right) \text{ and } \xi = 2J.$$

Therefore it follows from the definition of  $\text{KSD}(P_n, \pi)$  in (C.1) and the concentration bound (C.7) implied by Theorem C.1 that with at least probability  $1 - \delta$ ,

$$\text{KSD}(P_n, \pi) \leq \frac{C}{\sqrt{n}},$$

with the constant

$$C = J \left( \frac{\log(\frac{C_1}{\delta})}{C_2} + 2\sqrt{\frac{\log(\frac{C_1}{\delta})}{C_2}} \right).$$

Since by definition the constant  $A = \mathcal{O}(\sqrt{d})$  for large  $d$ , we have that the constant  $C = \mathcal{O}(\sqrt{d})$ . This completes the proof.

## D Summarizing Propositions 3.1 - 3.3

The theorem below summarizes the Propositions 3.1 - 3.3 above, serving as one of the ingredients for proving Theorem 2.1.

**Theorem D.1.** *Let  $\pi$  be a probability measure on  $\mathbb{R}^d$  and let  $P_n = \frac{1}{n} \sum_{i=1}^n \delta_{X_i}$  be the empirical measure associated to the i.i.d. samples  $\{X_i\}_{i=1}^n$  drawn from  $\pi$ . Then we have the following:*

1. *If  $\pi$  satisfies  $M_3 = \mathbf{E}_{X \sim \pi} |X|^3 < \infty$ , then there exists a realization of empirical measure  $P_n$  such that*

$$\mathcal{W}_1(P_n, \pi) \leq C \cdot \begin{cases} n^{-1/2}, & d = 1, \\ n^{-1/2} \log n, & d = 2, \\ n^{-1/d}, & d \geq 3, \end{cases}$$

where the constant  $C$  depends only on  $M_3$ .

2. *If  $k$  satisfies Assumption K2 with constant  $K_0$ , then there exists a realization of empirical measure  $P_n$  such that*

$$\text{MMD}(P_n, \pi) \leq \frac{C}{\sqrt{n}},$$

where the constant  $C$  depending only on  $K_0$ .

3. *If  $\pi$  satisfies Assumption 1 and 2 and  $k$  satisfies Assumption K3 with constant  $K_1$ , then there exists a realization of empirical measure  $P_n$  such that*

$$\text{KSD}(P_n, \pi) \leq C \sqrt{\frac{d}{n}},$$

where the constant  $C$  depends only on  $L, K_1, m^*, v$ .

## E Semi-discrete optimal transport with quadratic cost

### E.1 Structure theorem of optimal transport map

We recall the structure theorem of optimal transport map between  $\mu$  and  $\nu$  under the assumption that  $\mu$  does not give mass to null sets.

**Theorem E.1** ([8, Theorem 2.9 and Theorem 2.12]). *Let  $\mu$  and  $\nu$  be two probability measures on  $\mathbb{R}^d$  with finite second moments. Assume that  $\mu$  is absolutely continuous with respect to the Lebesgue measure. Consider the functionals  $\mathcal{K}$  and  $\mathcal{J}$  defined in Monge's problem (4.1) and dual Kantorovich problem (4.2) with  $c = \frac{1}{2}|x - y|^2$ . Then*

(i) *there exists a unique solution  $\pi$  to Kantorovich's problem, which is given by  $\pi(dx dy) = (\mathbf{Id} \times T)_{\#} \mu$  where  $T(x) = \nabla \bar{\varphi}(x)$   $\mu$ -a.e.  $x$  for some convex function  $\bar{\varphi} : \mathbb{R}^d \rightarrow \mathbb{R}$ . In another word,  $T(x) = \nabla \bar{\varphi}(x)$  is the unique solution to Monge's problem.*

(ii) there exists an optimal pair  $(\varphi(x), \varphi^c(y))$  or  $(\psi^c(x), \psi(y))$  solving the dual Kantorovich's problem, i.e.  $\sup_{(\varphi, \psi) \in \Phi_c} \mathcal{J}(\varphi, \psi) = \mathcal{J}(\varphi, \varphi^c) = \mathcal{J}(\psi^c, \psi)$ ;

(iii) the function  $\bar{\varphi}(x)$  can be chosen as  $\bar{\varphi}(x) = \frac{1}{2}|x|^2 - \varphi(x)$  (or  $\bar{\varphi}(x) = \frac{1}{2}|x|^2 - \psi^c(x)$ ) where  $(\varphi(x), \varphi^c(y))$  (or  $(\psi^c(x), \psi(y))$ ) is an optimal pair which maximizes  $\mathcal{J}$  within the set  $\Phi_c$ .

## E.2 Proof of Theorem 4.2

Recall that the dual Kantorovich problem in the semi-discrete case reduces to maximizing the following functional

$$\mathcal{F}(\psi) = \int \inf_j \left( \frac{1}{2}|x - y_j|^2 - \psi_j \right) \rho(x) dx + \sum_{j=1}^n \psi_j \nu_j. \quad (\text{E.1})$$

Proof of Theorem 4.2 relies on two useful lemmas on the functional  $\mathcal{F}$ . The first lemma below shows that the functional  $\mathcal{F}$  is concave, whose proof adapts that of [5, Theorem 2] for semi-discrete optimal transport with the quadratic cost.

**Lemma E.1.** *Let  $\rho$  be a probability density on  $\mathbb{R}^d$ . Let  $\{y_j\}_{j=1}^n \subset \mathbb{R}^d$  and let  $\{\nu_j\}_{j=1}^n \subset [0, 1]$  be such that  $\sum_{j=1}^n \nu_j = 1$ . Then the functional  $\mathcal{F}$  be defined by (E.1) is concave.*

*Proof.* Let  $\mathcal{A} : \mathbb{R}^d \rightarrow \{1, 2, \dots, n\}$  be an assignment function which assigns a point  $x \in \mathbb{R}^d$  to the index  $j$  of some point  $y_j$ . Let us also define the function

$$\tilde{\mathcal{F}}(\mathcal{A}, \psi) = \int \left( \frac{1}{2}|x - y_{\mathcal{A}(x)}|^2 - \psi_{\mathcal{A}(x)} \right) \rho(x) dx + \sum_{j=1}^n \psi_j \nu_j.$$

Then by definition  $\mathcal{F}(\psi) = \inf_{\mathcal{A}} \tilde{\mathcal{F}}(\mathcal{A}, \psi)$ . Denote  $\mathcal{A}^{-1}(j) = \{x \in \mathbb{R}^d | \mathcal{A}(x) = j\}$ . Then

$$\begin{aligned} \tilde{\mathcal{F}}(\mathcal{A}, \psi) &= \sum_{j=1}^n \left[ \int_{\mathcal{A}^{-1}(j)} \left( \frac{1}{2}|x - y_j|^2 - \psi_j \right) \rho(x) dx + \psi_j \nu_j \right] \\ &= \sum_{j=1}^n \int_{\mathcal{A}^{-1}(j)} \frac{1}{2}|x - y_j|^2 \rho(x) dx + \sum_{j=1}^n \psi_j \left( \nu_j - \int_{\mathcal{A}^{-1}(j)} \rho(x) dx \right). \end{aligned}$$

Since the function  $\tilde{\mathcal{F}}(\mathcal{A}, \psi)$  is affine in  $\psi$  for every  $\mathcal{A}$ , it follows that  $\mathcal{F}(\psi) = \inf_{\mathcal{A}} \tilde{\mathcal{F}}(\mathcal{A}, \psi)$  is concave.  $\square$

The next lemma computes the gradient of the concave function  $\mathcal{F}$ ; see [5, Section 7.4] for the corresponding result with general transportation cost.

**Lemma E.2.** *Let  $\rho$  be a probability density on  $\mathbb{R}^d$ . Let  $\{y_j\}_{j=1}^n \subset \mathbb{R}^d$  and let  $\{\nu_j\}_{j=1}^n \subset [0, 1]$  be such that  $\sum_{j=1}^n \nu_j = 1$ . Denote by  $P_j(\psi)$  the power diagram associated to  $\psi$  and  $y_j$ . Then*

$$\partial_{\psi_i} \mathcal{F}(\psi) = \nu_i - \mu(P_i(\psi)) = \nu_i - \int_{P_i(\psi)} \rho(x) dx. \quad (\text{E.2})$$

*Proof.* By the definition of  $\mathcal{F}$  in (E.1), we rewrite  $\mathcal{F}$  as

$$\begin{aligned} \mathcal{F}(\psi) &= \int \frac{1}{2}|x|^2 \rho(dx) + \int \inf_j \left\{ -x \cdot y_j + \frac{1}{2}|y_j|^2 - \psi_j \right\} \rho(x) dx + \sum_{j=1}^n \psi_j \nu_j \\ &= \int \frac{1}{2}|x|^2 \rho(dx) - \int \sup_j \left\{ x \cdot y_j + \psi_j - \frac{1}{2}|y_j|^2 \right\} \rho(x) dx + \sum_{j=1}^n \psi_j \nu_j \end{aligned}$$

To prove (E.2), it suffices to prove that

$$\partial_{\psi_i} \left( \int \sup_j \left\{ x \cdot y_j + \psi_j - \frac{1}{2}|y_j|^2 \right\} \rho(x) dx \right) = \int_{P_i(\psi)} \rho(x) dx. \quad (\text{E.3})$$

Note that the partial derivative on the left side of above makes sense since  $g(x, \psi) := \sup_j \{x \cdot y_j + \psi_j - \frac{1}{2}|y_j|^2\}$  is convex with respect to  $(x, \psi)$  on  $\mathbb{R}^d \times \mathbb{R}^d$  so that the resulting integral against the measure  $\rho$  is also convex (and hence Lipschitz) in  $\psi$ . To see (E.3), since  $g(x, \psi)$  is convex and piecewise linear in  $\psi$  for any fixed  $x$ , it is easy to observe that

$$\partial_{\psi_i} g(x, \psi) = \delta_{ij} \text{ if } x \in \left\{ x \in \mathbb{R}^d \mid x \cdot y_j + \psi_j - \frac{1}{2}|y_j|^2 = g(x, \psi) \right\}.$$

However, by subtracting  $\frac{1}{2}|x|^2$  on both sides of the equation inside the big parenthesis and then flipping the sign one sees that

$$\left\{ x \in \mathbb{R}^d \mid x \cdot y_j + \psi_j - \frac{1}{2}|y_j|^2 = g(x, \psi) \right\} = P_j(\psi).$$

Namely we have obtained that

$$\partial_{\psi_i} g(x, \psi) = \delta_{i,j} \text{ if } x \in P_j(\psi).$$

In particular, this implies that  $\psi \rightarrow g(x, \psi)$  is 1-Lipschitz in  $\psi$  uniformly with respect to  $x$ . Finally since  $\rho(x)$  is a probability measure, the desired identity (E.2) follows from the equation above and the dominated convergence theorem. This completes the proof of the lemma.  $\square$

With the lemmas above, we are ready to prove Theorem 4.2. In fact, according to Lemma E.1 and Lemma E.2,  $\psi = (\psi_1, \dots, \psi_n)$  is a maximizer of the functional  $\mathcal{F}$  if and only if

$$\partial_{\psi_i} \mathcal{F}(\psi) = \nu_i - \mu(P_i(\psi)) = \nu_i - \int_{P_i(\psi)} \rho(x) dx = 0.$$

Since the dual Kantorovich problem in the semi-discrete setting reduces to the problem of maximizing  $\mathcal{F}$ , it follows from Theorem E.1 that the optimal transport map  $T$  solving the semi-discrete Monge's problem (4.4) is given by  $T(x) = \nabla \bar{\varphi}(x)$  where  $\bar{\varphi}(x) = \frac{1}{2}|x|^2 - \varphi(x)$  and  $\varphi(x) = \min_j \frac{1}{2}|x - y_j|^2 - \psi_j$ . Consequently,

$$\begin{aligned} \bar{\varphi}(x) &= \frac{1}{2}|x|^2 - \varphi(x) \\ &= \frac{1}{2}|x|^2 - \left( \min_j \left\{ \frac{1}{2}|x - y_j|^2 - \psi_j \right\} \right) \\ &= \max_j \{x \cdot y_j + m_j\} \end{aligned}$$

with  $m_j = \psi_j - \frac{1}{2}|y_j|^2$ . Moreover, noticing that  $\varphi(x)$  can be rewritten as

$$\varphi(x) = \frac{1}{2}|x - y_j|^2 - \psi_j \text{ if } x \in P_j(\psi),$$

one obtains that  $T(x) = \nabla \bar{\varphi}(x) = y_j$  if  $x \in P_j(\psi)$ .

### E.3 Proof of Proposition 4.1

Let us first consider the case that  $n = 2^k$  for some  $k \in \mathbb{N}$ . Then

$$\bar{\varphi}(x) = \max_{j=1, \dots, 2^k} \{x \cdot y_j + m_j\} = \max_{j=1, \dots, 2^{k-1}} \max_{i \in \{2j-1, 2j\}} \{x \cdot y_i + m_i\}.$$

Let us define maps  $\varphi_n : \mathbb{R}^n \rightarrow \mathbb{R}^{n/2}$  and  $\psi : \mathbb{R}^d \rightarrow \mathbb{R}^n$  by setting

$$[\varphi_n(z)]_i = \max\{z_{2i-1}, z_{2i}\}, i = 1, \dots, n/2 \text{ and } [\psi(x)]_j = x \cdot y_j + m_j, j = 1, \dots, n.$$

Then by definition it is straightforward that

$$\bar{\varphi}(x) = (\varphi_2 \circ \varphi_4 \circ \dots \circ \varphi_{n/2} \circ \varphi_n \circ \psi)(x). \tag{E.4}$$

By defining

$$Y = \begin{pmatrix} y_1^T \\ y_2^T \\ \vdots \\ y_n^T \end{pmatrix}, m = \begin{pmatrix} m_1 \\ m_2 \\ \vdots \\ m_n \end{pmatrix},$$

we can write the map  $\psi$  as

$$\psi(x) = Y \cdot x + m. \quad (\text{E.5})$$

Moreover, thanks to the following simple equivalent formulation of the maximum function:

$$\begin{aligned} \max(a, b) &= \text{ReLU}(a - b) + \text{ReLU}(b) - \text{ReLU}(-b) \\ &= h^T \cdot \text{ReLU} \left( A \begin{pmatrix} a \\ b \end{pmatrix} \right), \end{aligned}$$

where

$$A = \begin{pmatrix} 1 & -1 \\ 0 & 1 \\ 0 & -1 \end{pmatrix}, \quad h = \begin{pmatrix} 1 \\ 1 \\ -1 \end{pmatrix},$$

we can express the map  $\varphi_n$  in terms of a two-layer neural network as follows

$$\varphi_n(z) = H_{n/2} \cdot \text{ReLU}(A_n \cdot z), \quad (\text{E.6})$$

where  $A_n = \oplus^n A$  and  $H_n = \oplus^n h$ . Finally, by combining (E.4), (E.5) and (E.6), one sees that  $\bar{\varphi}$  can be expressed in terms of a DNN of width  $n$  and depth  $\log n$  with parameters  $(W^\ell, b^\ell)_{\ell=1}^{L+1}$  defined by

$$\begin{aligned} W^0 &= A_n \cdot Y, & b^0 &= A_n \cdot m, \\ W^1 &= A_{n/2} \cdot H_{n/2}, & b^1 &= 0, \\ W^2 &= A_{n/4} \cdot H_{n/4}, & b^2 &= 0, \\ &\dots, \\ W_{L-1} &= A_2 \cdot H_2, & b^{L-1} &= 0, \\ W_L &= H_1, & b^L &= 0. \end{aligned}$$

In the general case where  $\log_2 n \notin \mathbb{N}$ , we set  $k = \lceil \log_2 n \rceil$  so that  $k$  is smallest integer such that  $2^k > n$ . By redefining  $y_j = 0$  and  $m_j = 0$  for  $j = n + 1, \dots, 2^k$ , we may still write  $\bar{\varphi}(x) = \max_{j=1, \dots, 2^k} \{x \cdot y_j + m_j\}$  so that the analysis above directly applies.

## F Proof of Main Theorem 2.1

The proof follows directly from Theorem D.1 and Theorem 4.1. Indeed, on the one hand, the quantitative estimate for the convergence of the empirical measure  $P_n$  directly translates to the sample complexity bounds in Theorem 2.1 with a given error  $\varepsilon$ . On the other hand, Theorem 4.1 provides a push-forward from  $p_x$  to the empirical measure  $P_n$  based on the gradient of a DNN.

## References

- [1] S. Bobkov and M. Ledoux. One-dimensional empirical measures, order statistics, and Kantorovich transport distances. *Mem. Amer. Math. Soc.*, 261(1259):0, 2019.
- [2] I. Borisov. Approximation of distributions of von mises statistics with multidimensional kernels. *Siberian Mathematical Journal*, 32(4):554–566, 1991.
- [3] D. Hsu, S. Kakade, T. Zhang, et al. A tail inequality for quadratic forms of subgaussian random vectors. *Electronic Communications in Probability*, 17, 2012.
- [4] J. Lei. Convergence and concentration of empirical measures under wasserstein distance in unbounded functional spaces. *Bernoulli*, 26(1):767–798, 2020.
- [5] B. Lévy and E. L. Schwindt. Notions of optimal transport theory and how to implement them on a computer. *Computers & Graphics*, 72:135–148, 2018.
- [6] Q. Liu, J. Lee, and M. Jordan. A kernelized stein discrepancy for goodness-of-fit tests. In *International conference on machine learning*, pages 276–284, 2016.
- [7] B. Sriperumbudur. On the optimal estimation of probability measures in weak and strong topologies. *Bernoulli*, 22(3):1839–1893, 2016.
- [8] C. Villani. *Topics in optimal transportation*. Number 58. American Mathematical Soc., 2003.
